# Supplementary material for: Identification of Thymosin β4 as an effector of Hand1-mediated vascular development
Source: PubMed Central journal article supplement — Nat Commun. 2010 Jul 27;1(4):1–10. doi: 10.1038/ncomms1041 (PMC2963826; doi:10.1038/ncomms1041), 2010-07-27
Supplement: ncomms1041-s1.pdf [file ncomms1041-s1.pdf]

Supplementary Figure S1

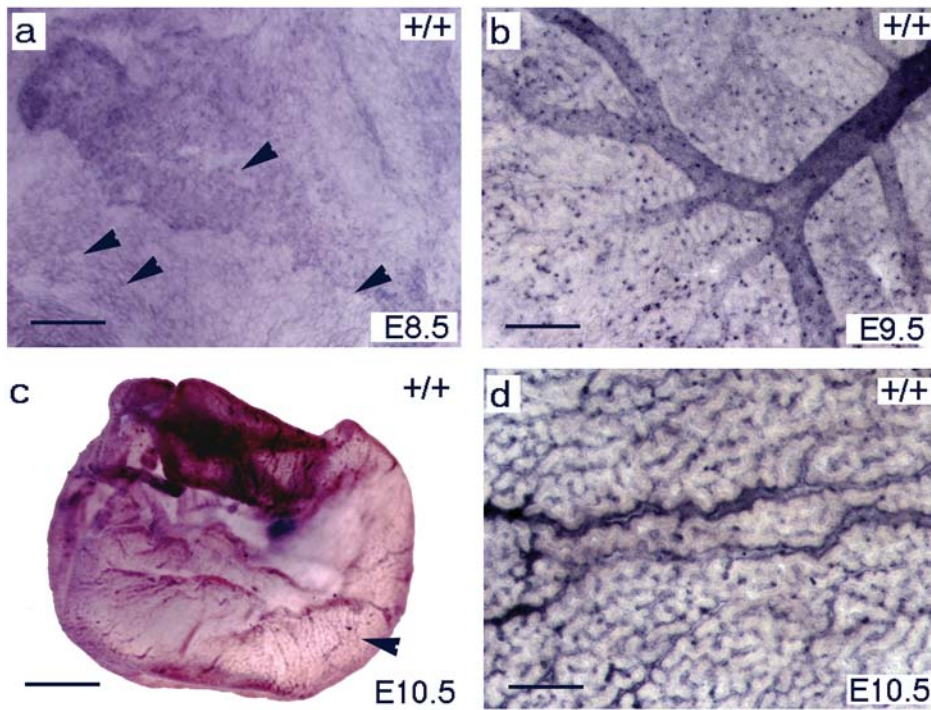

***Tbeta4* is expressed in the developing yolk sac vasculature**

In situ hybridisation revealed *Tbeta4* expression in the blood islands of the yolk sac at E8.5 (**a**) and in the developing vessels at E9.5 (**b**) and E10.5 (**c**, **d**). Scale bars, **a**, **b**, 100  $\mu\text{m}$ ; **c**, 250  $\mu\text{m}$ ; **d**, 50  $\mu\text{m}$ .

## Supplementary Figure S2

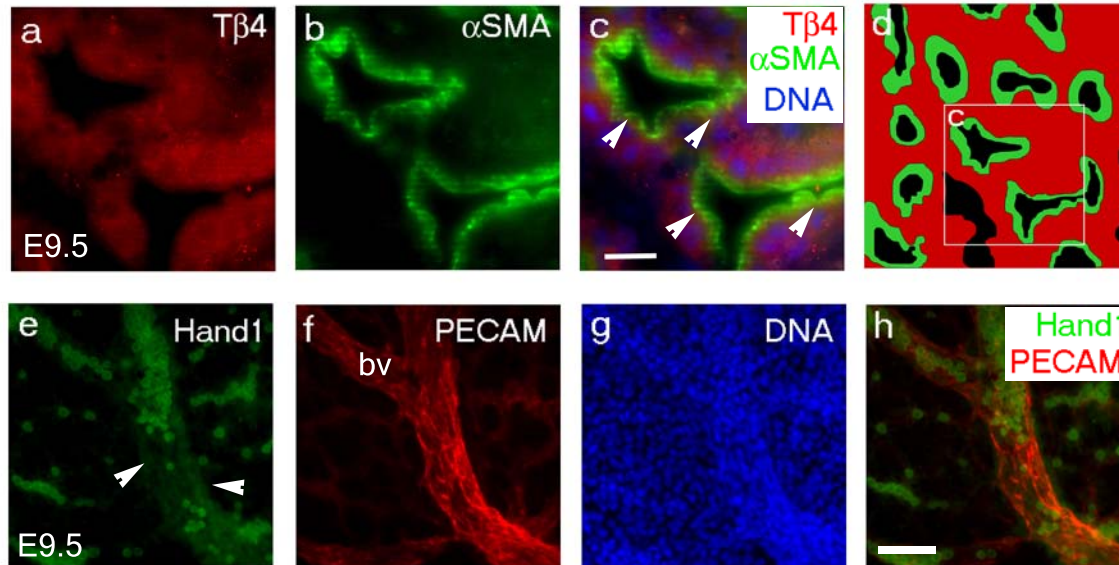

### **TB4 is not expressed in smooth muscle cells within the developing yolk sac vasculature and Hand1 is down-regulated during vessel maturation**

TB4 is not expressed in smooth muscle cells in the yolk sac vasculature at E9.5 (**a-c**) consistent with Hand1 expression at the same stage (see Fig. 4f, g); white arrowheads in **c** highlight  $\alpha$ -SMA<sup>+</sup> cells in green, lining TB4<sup>+</sup> endothelium in red. Schematic of the representative region encompassing panel **c**, at lower magnification, to highlight plexus and network of vessels in red lined with green smooth muscle cells; black regions represents gaps between neighboring vessels and not individual vessel lumens (**d**). As the yolk sac endothelium matures with ongoing yolk sac angiogenesis Hand1 is down-regulated (**e-h**). Weak Hand1 immunostaining is highlighted in the vessel wall by white arrowheads (**e**). PECAM staining reveals elongated mature endothelial cells within the vessel wall (**f, h**). bv, blood vessel. Scale bars; **c**, 20  $\mu$ m; **h**, 10  $\mu$ m.

**Supplementary Table S1. Primer sequences**

| <b>Gene</b>                                |         | <b>Primer Sequence (5'-3')</b> |
|--------------------------------------------|---------|--------------------------------|
| <b>qRT-PCR PRIMERS</b>                     |         |                                |
| <b>Tβ4</b>                                 | Forward | ATGTCTGACAAACCCGATATGGC        |
|                                            | Reverse | CCAGCTTGCTTCTCTTGTTC           |
| <b>Hand1</b>                               | Forward | TGAGTGCATCCCCAATGTG            |
|                                            | Reverse | GCCAGCACGTCCATCAAGTA           |
| <b>Pecam</b>                               | Forward | CTGCCAGTCCGAAAATGGAAC          |
|                                            | Reverse | CTTCATCCACCGGGGCTATC           |
| <b>Vegfa</b>                               | Forward | GCACATAGAGAGAATGAGCTTCC        |
|                                            | Reverse | CTCCGCTCTGAACAAGGCT            |
| <b>Flt1</b>                                | Forward | CTCAGACAAGTCAAACCTGGAG         |
|                                            | Reverse | GGGAACTTCATCTGGGTCCATAA        |
| <b>Tgfβ1</b>                               | Forward | CTCCCGTGGCTTCTAGTGC            |
|                                            | Reverse | GCCTTAGTTTGGACAGGATCTG         |
| <b>TgfβR2</b>                              | Forward | CCGCTGCATATCGTCCTGTG           |
|                                            | Reverse | AGTGGATGGATGGTCCTATTACA        |
| <b>Smad2</b>                               | Forward | ATGTCGTCCATCTTGCCATTC          |
|                                            | Reverse | AACCGTCCTGTTTTCTTTAGCTT        |
| <b>Smad5</b>                               | Forward | TTGTTTCAGAGTAGGAACTGCAAC       |
|                                            | Reverse | GAAGCTGAGCAAACCTCCTGAT         |
| <b>Endoglin</b>                            | Forward | CCCTCTGCCCATTACCCTG            |
|                                            | Reverse | GTAAACGTCACCTCACCCCTT          |
| <b>Notch1</b>                              | Forward | CCCTTGCTCTGCCTAACGC            |
|                                            | Reverse | GGAGTCCTGGCATCGTTGG            |
| <b>Notch2</b>                              | Forward | ATGTGGACGAGTGTCTGTTGC          |
|                                            | Reverse | GGAAGCATAGGCACAGTCATC          |
| <b>Notch4</b>                              | Forward | CTCTTGCCACTCAATTTCCCT          |
|                                            | Reverse | TTGCAGAGTTGGGTATCCCTG          |
| <b>Hand1 GENOTYPING PRIMERS</b>            |         |                                |
| WT Forward (proximal exon 2)               |         | CCACTAGGATCGCACGTGCA           |
| Mutant Forward (neo <sup>r</sup> cassette) |         | GCAAAGCTGCTATTGGCCGC           |
| Common Reverse (distal exon 2)             |         | CCAGCAACGATTGGGAACGC           |
